# Supplementary material for: Comparative analysis of similarity measurements in miRNAs with applications to miRNA-disease association predictions
Source: PubMed Central journal article supplement (PMC7199309; doi:10.1186/s12859-020-3515-9), 2020-05-04

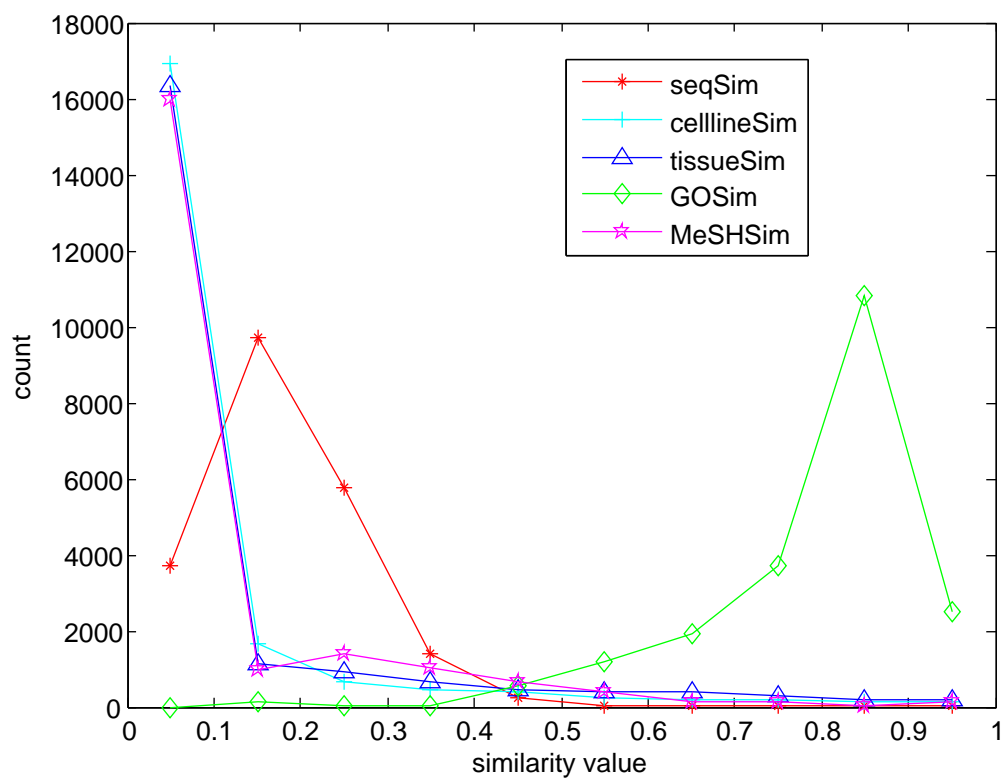

Supplement: 12859_2020_3515_MOESM1_ESM.pdf [file 12859_2020_3515_MOESM1_ESM.pdf]
